# Supplementary material
Source: HighWire-hosted journal article supplement (https://www.cmaj.ca/highwire/filestream/79484/field_highwire_adjunct_files/0/201959-five-1-at.pdf)
Supplement: 201959-five-1-at.pdf [file 201959-five-1-at.pdf]

## Appendix 1 (as submitted by the authors): Supplementary tables

| Table S1. Summary of antihistamines of choice for allergy and urticaria.*                       |                                 |                                 |                                                                                                          |                  |                                                                                |                                            |                                                                                                                                                   |
|-------------------------------------------------------------------------------------------------|---------------------------------|---------------------------------|----------------------------------------------------------------------------------------------------------|------------------|--------------------------------------------------------------------------------|--------------------------------------------|---------------------------------------------------------------------------------------------------------------------------------------------------|
| Antihistamines (dose frequency)                                                                 | Available in liquid form        | Available in tablet form, (mg)† | Hepatic or renal dosing                                                                                  | Brand            | Approximate price in CAD                                                       | Approximate price per unit                 | Considerations                                                                                                                                    |
| Bilastine (1-2 times per day)                                                                   | No                              | Yes (20)                        | No Δ                                                                                                     | Blexten          | \$38 (30 tabs)                                                                 | \$1.00-1.27                                | By prescription only. Among least sedating. Lack of safety data in pregnancy/breastfeeding.                                                       |
| Cetirizine (1-2 times per day)                                                                  | Yes (2 yr)‡ [6 mo]§             | Yes (10)                        | 5mg daily for either impairment                                                                          | Reactine         | \$17 (30 tabs)<br>\$12 (118ml)<br>\$24 (24x Fast Melt Jr)<br>\$15 (118ml kids) | \$0.57<br>\$0.10/mL<br>\$1.00<br>\$0.13/mL | Prescribed versions often have barriers to access (eg. EAP forms with very low approval rates; cost \$0.48-\$0.75 per 10 or 20 mg tablet)         |
|                                                                                                 |                                 |                                 |                                                                                                          | Allergy Relief   | \$30 (48 tabs)<br>\$47 (84 tabs)                                               | \$0.62<br>\$0.56                           |                                                                                                                                                   |
|                                                                                                 |                                 |                                 |                                                                                                          | Kirkland         | \$19 (200 tabs)                                                                | \$0.10                                     |                                                                                                                                                   |
| Desloratadine (1-2 times per day)                                                               | Yes (2 yr)‡ [6 mo]§             | Yes (5)                         | No Δ                                                                                                     | Aerius           | \$40 (50 tabs)<br>\$14 (100ml Kids version)                                    | \$0.80<br>\$0.14/mL                        | Along with cetirizine, fexofenadine, and loratadine, among the most affordable.                                                                   |
|                                                                                                 |                                 |                                 |                                                                                                          | Allergy Control  | \$38 (50 tabs)                                                                 | \$0.76                                     |                                                                                                                                                   |
|                                                                                                 |                                 |                                 |                                                                                                          | Equate           | \$28 (70 tabs)                                                                 | \$0.40                                     |                                                                                                                                                   |
|                                                                                                 |                                 |                                 |                                                                                                          | Kirkland         | \$19 (180 tabs)                                                                | \$0.11                                     |                                                                                                                                                   |
| Fexofenadine (1-2 times per day)                                                                | No                              | Yes (120)                       | No Δ for either per manufacturer, but others suggest renal dosing                                        | Allegra          | \$17 (30 tabs)                                                                 | \$0.57                                     | Among least sedating (OR 0.59 [95% CI, 0.38 to 0.93] compared to most other 2 <sup>nd</sup> generation antihistamines <sup>5</sup> ).             |
| Loratadine (1-2 times per day)                                                                  | Yes (2 yr)‡ [1 yr]§             | Yes (10)                        | No Δ for either per manufacturer, but others including WHO suggest renal and hepatic dosing <sup>3</sup> | Claritin         | \$30 (50 tabs)<br>\$13 (120ml Kids version)                                    | \$0.60<br>\$0.11/mL                        | Prescribed versions often have barriers to access (eg. EAP forms with very low approval rates; \$0.63 per 10 mg).                                 |
|                                                                                                 |                                 |                                 |                                                                                                          | Allertin         | \$43 (85 tabs)                                                                 | \$0.51                                     |                                                                                                                                                   |
|                                                                                                 |                                 |                                 |                                                                                                          | Allergy Remedy   | \$20 (30 tabs)                                                                 | \$0.67                                     |                                                                                                                                                   |
| Rupatadine (1-2 times per day)                                                                  | Yes (2 yr)‡                     | Yes (10)                        | Use not recommended                                                                                      | Rupall           | \$38 (30 tabs)<br>\$27 (120ml)                                                 | \$1.00-1.27<br>\$0.22                      | By prescription only. Lack of safety data in pregnancy/breastfeeding.                                                                             |
| For comparison: Diphenhydramine, a 1 <sup>st</sup> generation antihistamine (4-6 times per day) | X<br>N/A<br>[6 yr] <sup>¶</sup> | Yes (20)                        | No Δ for either per manufacturer                                                                         | Benadryl Allergy | \$23 (60 caps)<br>\$15 (20 chewables)<br>\$13 (100 mL children liquid)         | \$0.38<br>\$0.75<br>\$0.13/mL              | Not recommended due to many and sometimes fatal adverse effects.<br><br>Rapid IV administration can cause vasodilation, hypotension and sedation. |
|                                                                                                 |                                 |                                 |                                                                                                          | Allergy formula  | \$12 (20 liquid caps)                                                          | \$0.58                                     |                                                                                                                                                   |

CI = confidence interval, EAP = exceptional access program, OR = odds ratio, Δ = change.

\*First-generation antihistamines (e.g., diphenhydramine [Benadryl], chlorpheniramine [Chlor-Tripolon], hydroxyzine [Atarax]) have worldwide concerns<sup>1-3</sup> about toxicity and drug-drug interaction, with no better efficacy, accessibility or affordability compared to the preferred second-generation antihistamines. Diphenhydramine is included only for comparison and is not an antihistamine of choice. Antihistamines should not be consumed with alcohol.

†Standard adult dose in parentheses of tablet column

‡ Youngest age of approval from Health Canada in parentheses of liquid form.  
§FDA approved and/or supporting RCT evidence for efficacy and safety starting at this age<sup>2,3</sup>

## References

1. Fein, M.N., Fischer, D.A., O'Keefe, A.W. *et al.* CSACI position statement: Newer generation H<sub>1</sub>-antihistamines are safer than first-generation H<sub>1</sub>-antihistamines and should be the first-line antihistamines for the treatment of allergic rhinitis and urticaria. *Allergy Asthma Clin Immunol* 15, 61 (2019). <https://doi.org/10.1186/s13223-019-0375-9>
2. Carson S, Lee N, Thakurta S. Drug Class Review: Newer Antihistamines: Final Report Update 2. Portland (OR): Oregon Health & Science University; May 2010.
3. Section 3: Antiallergics and Medicines Used in Anaphylaxis, Histamine-1 receptor antagonists – A critical evaluation to update Section 3, Developed by Harinder Chahal, For WHO Secretariat
4. Gilboa, S.M., Ailes, E.C., Pai, R.P. *et al.* Antihistamines and birth defects: a systematic review of the literature. *Expert Opinion on Drug Safety* 13, 1667–1667 (2014). <https://doi.org/10.1517/14740338.2014.970164>
5. Huang CZ, Jiang ZH, Wang J, Luo Y, Peng H. Antihistamine effects and safety of fexofenadine: a systematic review and Meta-analysis of randomized controlled trials. *BMC Pharmacol Toxicol.* 2019;20(1):72. Published 2019 Nov 29. doi:10.1186/s40360-019-0363-1
